# Supplementary material for: RIP140 regulates POLK gene expression and the response to alkylating drugs in colon cancer cells
Source: PubMed Central journal article supplement (PMC9255241; doi:10.20517/cdr.2021.133), 2022-05-07
Supplement: cdr-5-2-401-SupplementaryMaterials.pdf [file cdr-5-2-401-SupplementaryMaterials.pdf]

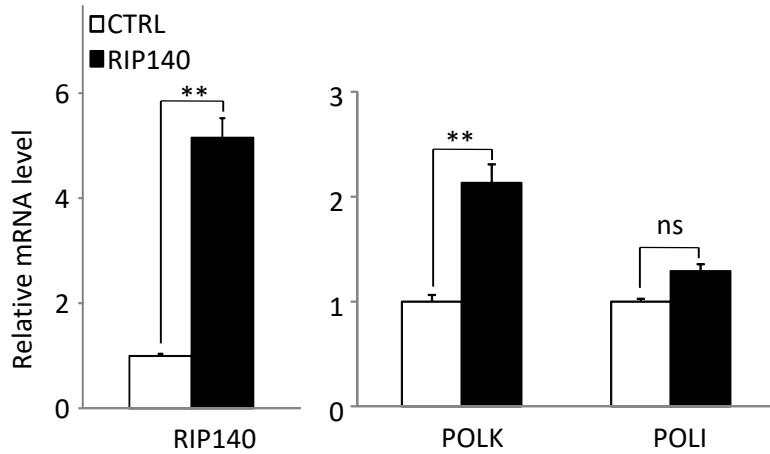

**Supplementary Figure 1. Expression of POLK in human HT29 CRC cells.** mRNA quantification of RIP140, POLK and POLI genes by RT-qPCR in HT29 cells after transient transfection of pEF-cmyc-RIP140.

## Supplementary Table 1. Primer sequences

| Gene Symbol | Forward Sequence       | Reverse Sequence      |
|-------------|------------------------|-----------------------|
| mRIP140     | AGAACGCACATCAGGTGGCA   | GATGGCCAGACACCCCTTTG  |
| mPOLK       | AGCCTGGCTTCCGATTCT     | TCCATGATGCAAACAGGGTA  |
| mPOLI       | AGGGCCTATGGACTGCTACC   | TGTGAGAGTCTTCCGTGTGG  |
| hRIP140     | AATGTGCACTTGAGCCATGATG | TCGGACACTGGTAAGGCAGG  |
| hPOLK       | CCTCCTGGGAGTTGTAGTCG   | CCCATCCTAAGCAGAAGATCA |
| hPOLI       | GGTCGTGAGAGTCGTCAGTG   | ATCAACCATTGGGGTCATCA  |
